# Supplementary material
Source: publisher figshare collection journal article supplement (https://acs.figshare.com/ndownloader/files/4636153)

# Supporting Information

## Oleanane-Type Triterpenes from the Flowers and Roots of *Saussurea*

### *muliensis*

Chun-Mei Liu, He-Xiang Wang, Shi-Lei Wei, and Kun Gao<sup>\*</sup>

*State Key Laboratory of Applied Organic Chemistry, College of Chemistry and Chemical Engineering, Lanzhou University, Lanzhou 730000, People's Republic of China*

#### Index:

Figure S1. <sup>1</sup>H NMR spectrum of **1** in CD<sub>3</sub>OD.

Figure S2. <sup>13</sup>C NMR (DEPT) spectrum of **1** in CD<sub>3</sub>OD.

Figure S3. HRESIMS of **1**.

Figure S4. <sup>1</sup>H NMR spectrum of **2** in CDCl<sub>3</sub>.

Figure S5. <sup>13</sup>C NMR spectrum of **2** in CDCl<sub>3</sub>.

Figure S6. HRESIMS of **2**.

Figure S7. <sup>1</sup>H NMR spectrum of **3** in CDCl<sub>3</sub>.

Figure S8. <sup>13</sup>C NMR spectrum of **3** in CDCl<sub>3</sub>.

Figure S9. HRESIMS of **3**.

Figure S10. <sup>1</sup>H NMR spectrum of **4** in DMSO-d<sub>6</sub>.

Figure S11. <sup>13</sup>C NMR spectrum of **4** in DMSO-d<sub>6</sub>.

Figure S12. HRESIMS of **4**.

Figure S13. <sup>1</sup>H NMR spectrum of **5** in CDCl<sub>3</sub>.

Figure S14. The magnified <sup>1</sup>H NMR spectrum of **5** in CDCl<sub>3</sub>.

---

<sup>\*</sup> To whom correspondence should be addressed. Tel: +86-0931-8912592. Fax: +86-931-8912582.  
E-mail: [npchem@lzu.edu.cn](mailto:npchem@lzu.edu.cn)

Figure S15.  $^{13}\text{C}$  NMR (DEPT) spectrum of **5** in  $\text{CDCl}_3$ .

Figure S16. HRESIMS of **5**.

Figure S17.  $^1\text{H}$  NMR spectrum of **6** in  $\text{CDCl}_3$ .

Figure S18.  $^{13}\text{C}$  NMR (DEPT) spectrum of **6** in  $\text{CDCl}_3$ .

Figure S19. HRESIMS of **6**.

Figure S1.  $^1\text{H}$  NMR spectrum of **1** in  $\text{CD}_3\text{OD}$ .

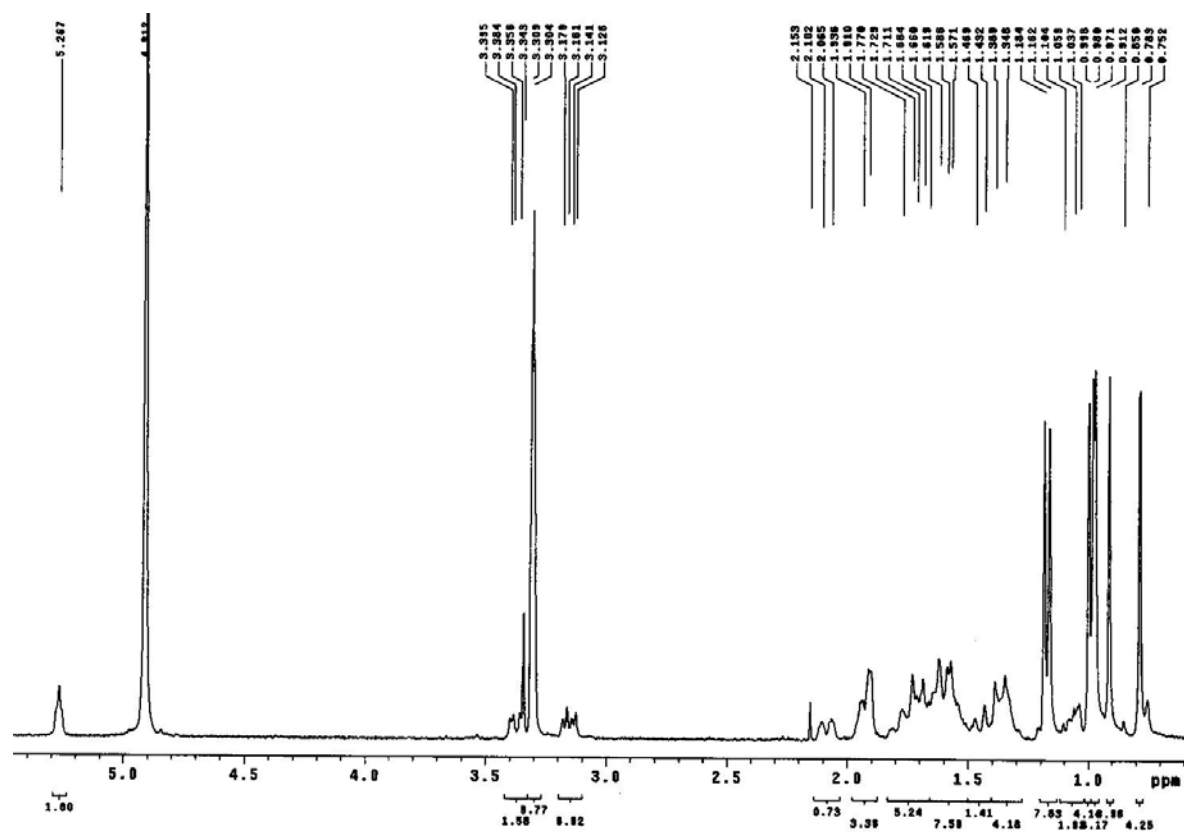

Figure S2. <sup>13</sup>C NMR (DEPT) spectrum of **1** in CD<sub>3</sub>OD.

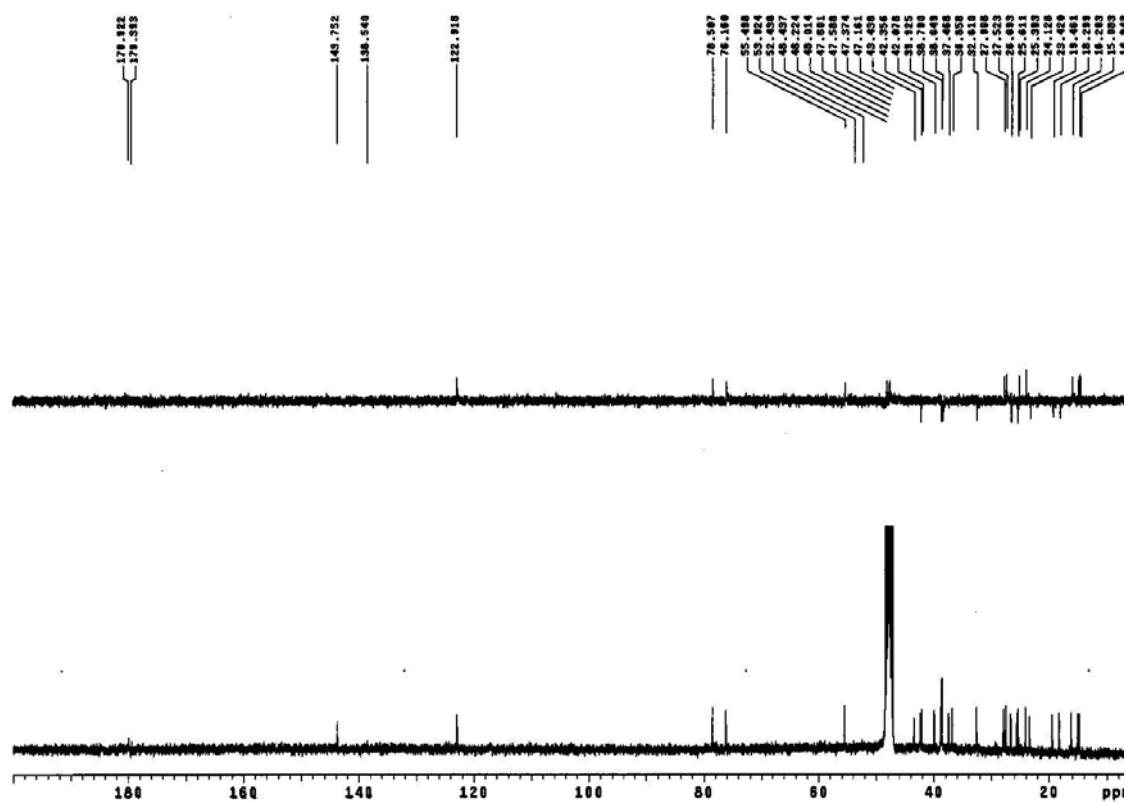

ESI negative, D138-9, M-H=471.3460, error=0.6ppm, 24/05/2007

Mass spectrum showing relative intensity (0.0 to 1.0) versus m/z (0 to 500). The base peak is at m/z 471.3483. Other labeled peaks include 472.3517 and 561.3798.

| m/z      | Relative Intensity |
|----------|--------------------|
| 471.3483 | 1.0                |
| 472.3517 | 0.35               |
| 561.3798 | 0.15               |

Figure S4.  $^1\text{H}$  NMR spectrum of **2** in  $\text{CDCl}_3$ .

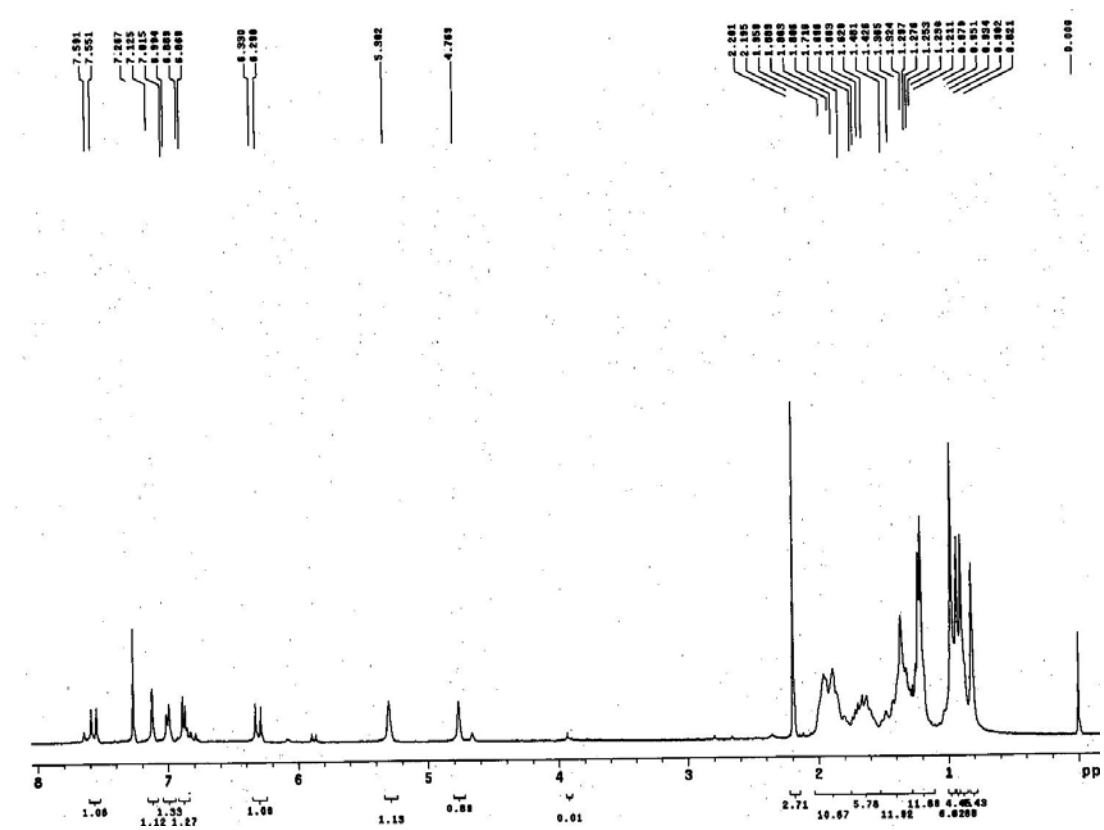

Figure S5. <sup>13</sup>C NMR spectrum of **2** in CDCl<sub>3</sub>.

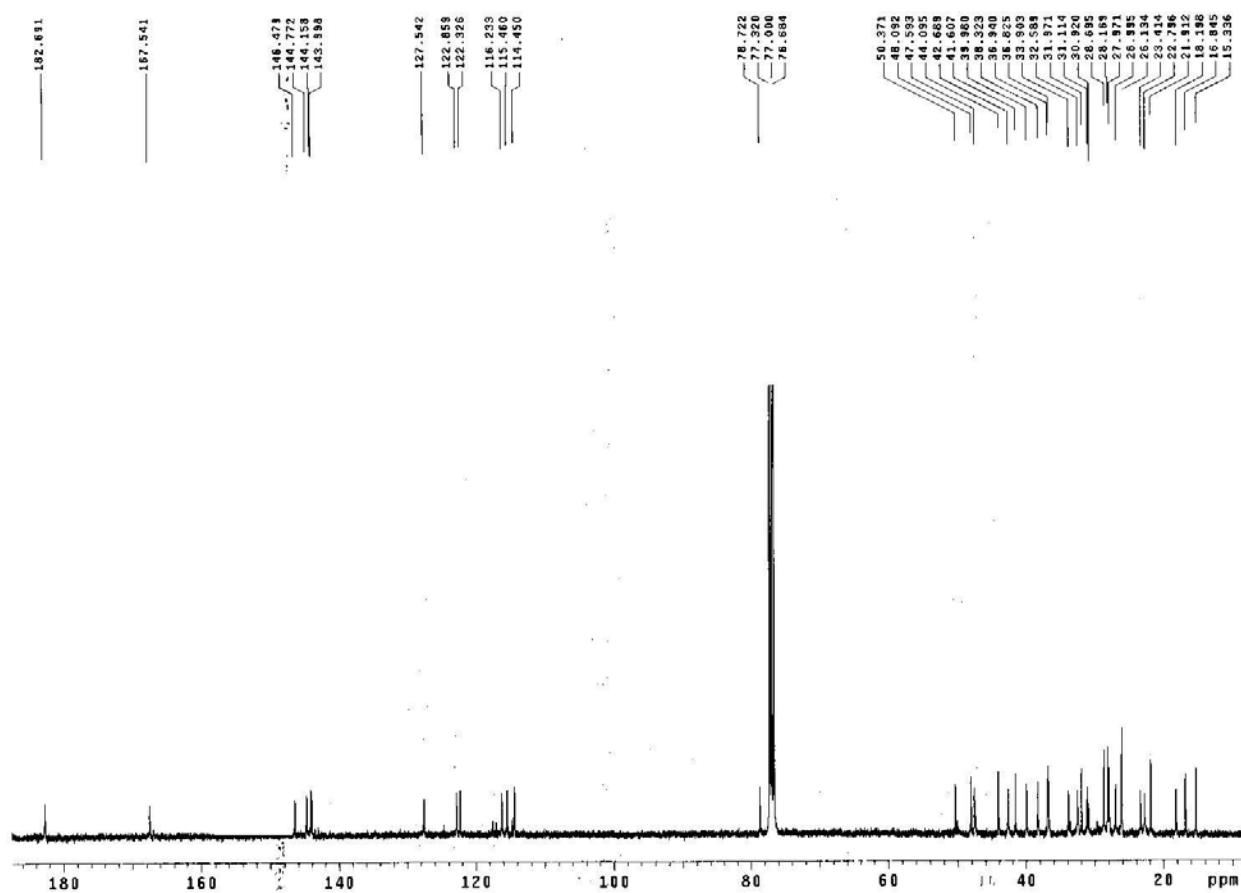

Figure S6. HRESIMS of **2**.

Figure S6

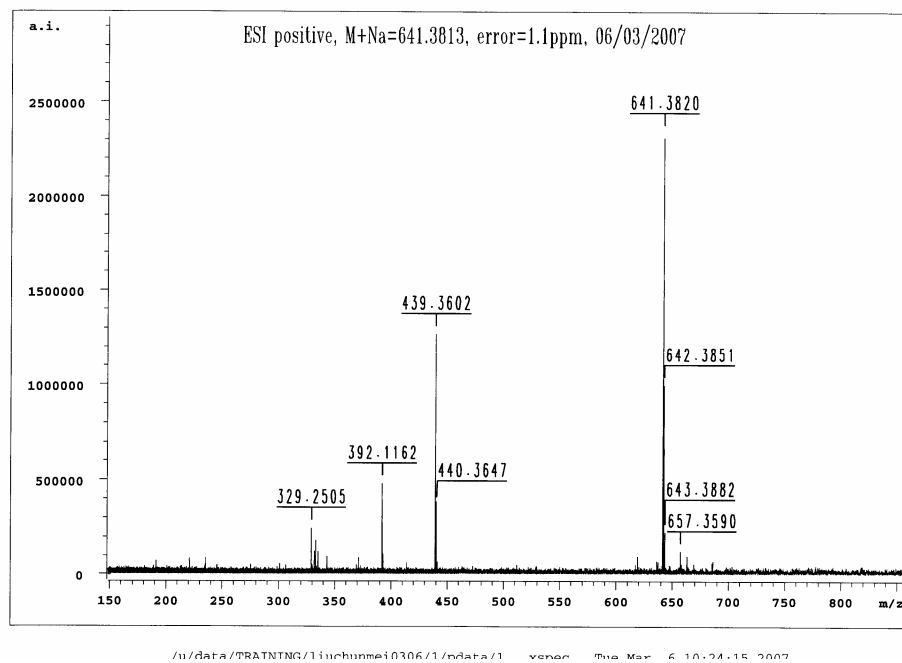



Figure S7. <sup>1</sup>H NMR spectrum of **3** in CDCl<sub>3</sub>.

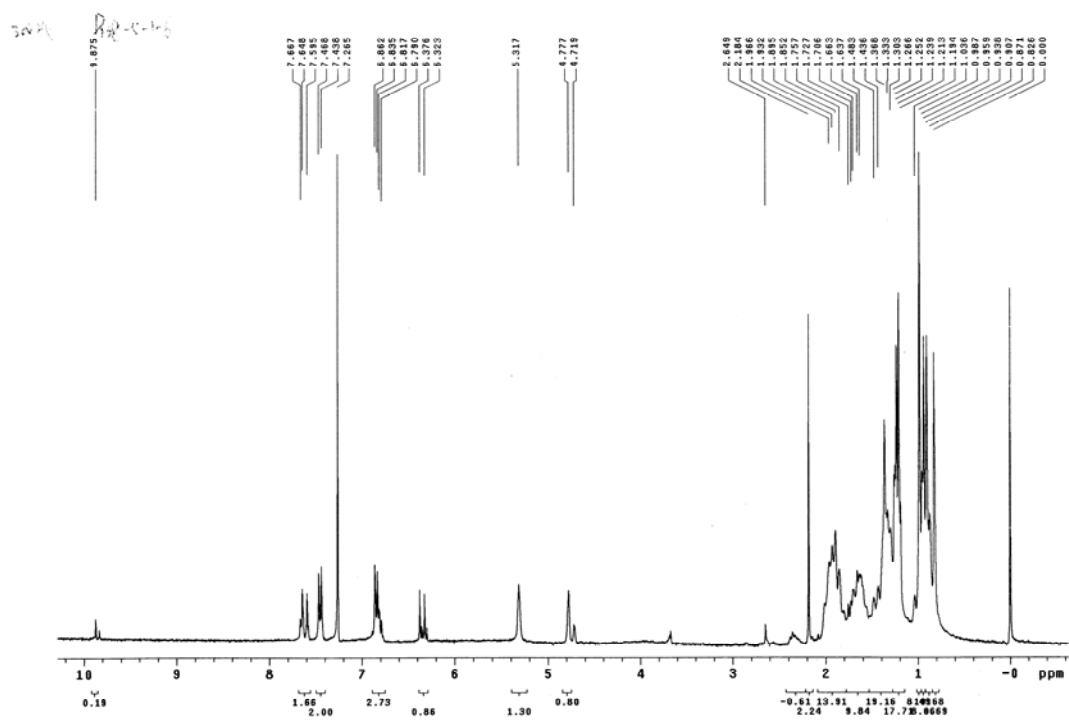

Figure S8. <sup>13</sup>C NMR spectrum of **3** in CDCl<sub>3</sub>.

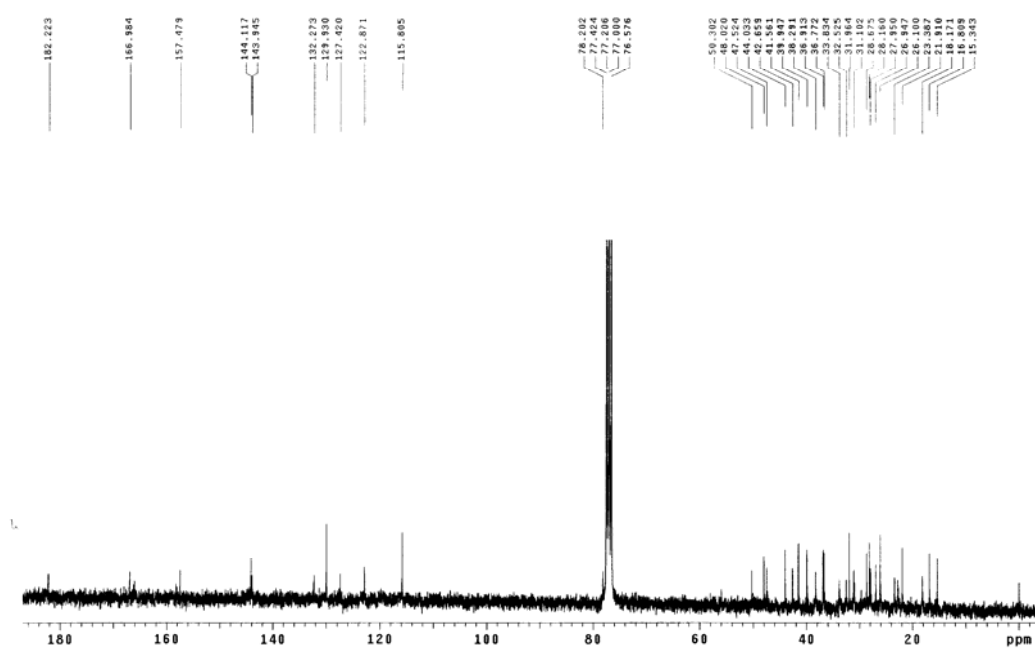

Figure S9. HRESIMS of **3**.

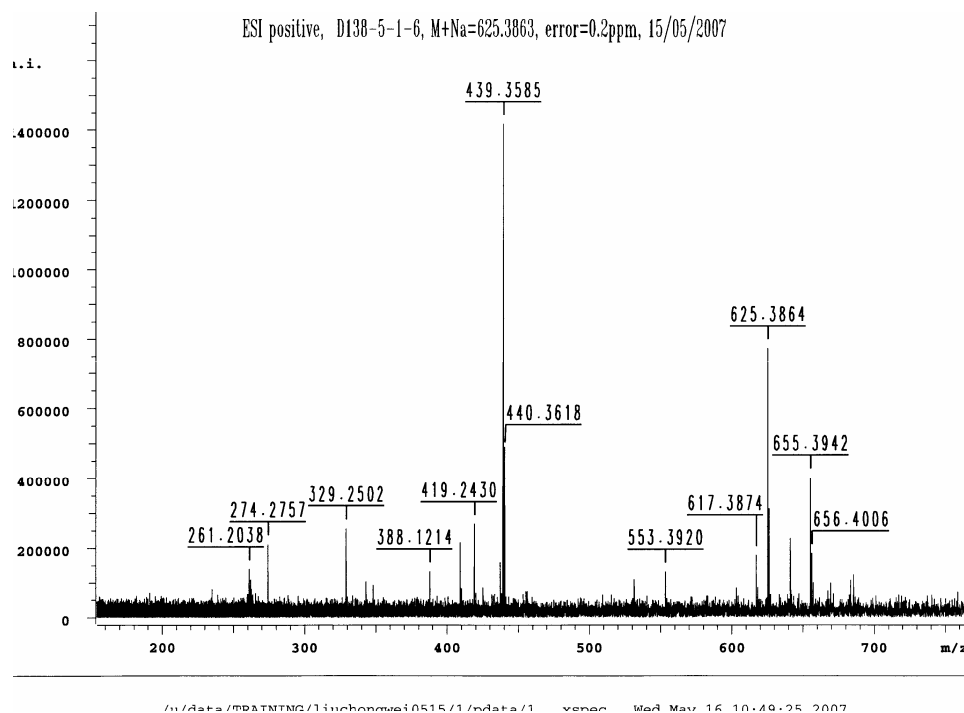

<sup>1</sup>H NMR spectrum of 1,2-dichloroethane. The spectrum shows several multiplets in the aromatic region (6.5-7.5 ppm) and a complex set of multiplets in the aliphatic region (0.5-3.5 ppm). The x-axis is labeled in ppm from 5.5 to 0.5.

Peak list (ppm): 5.226, 4.775, 4.763, 4.476, 3.527, 3.520, 3.441, 3.436, 3.413, 3.350, 3.341, 3.181, 3.134, 3.082, 3.072, 3.074, 2.469, 2.318, 2.305, 2.296, 2.286, 2.232, 2.231, 2.051, 2.020, 1.990, 1.983, 1.980, 1.852, 1.843, 1.817, 1.599, 1.571, 1.489, 1.488, 1.441, 1.441, 1.408, 1.376, 1.376, 1.258, 1.278, 1.243, 1.198, 1.142, 1.142, 1.084, 1.038, 1.025, 1.021, 0.884, 0.825, 0.788, 0.781.

Integrations: 0.00, 0.00, 1.00, 1.10, 1.27, 1.00, 2.34, 7.30, 3.00, 2.10, 3.00, 1.10, 7.00, 3.00.

Figure S11. <sup>13</sup>C NMR spectrum of **4** in DMSO-d<sub>6</sub>.

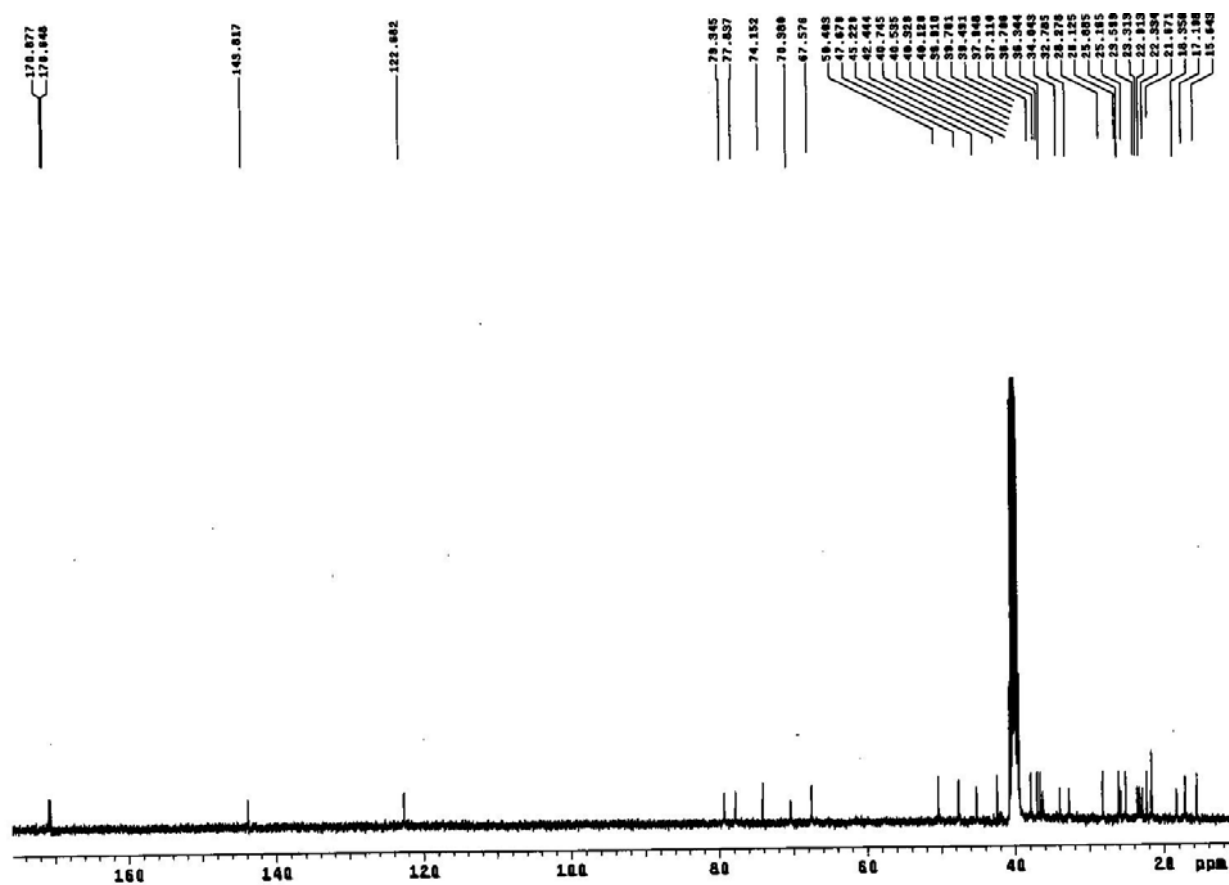

Figure S12. HRESIMS of **4**.

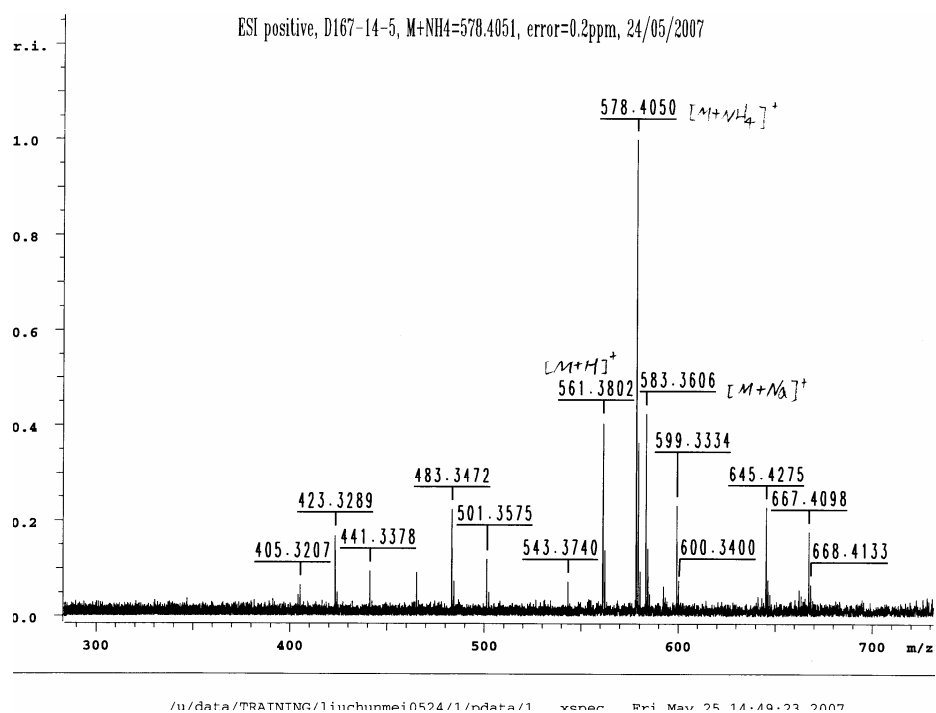

Figure S13. <sup>1</sup>H NMR spectrum of **5** in CDCl<sub>3</sub>.

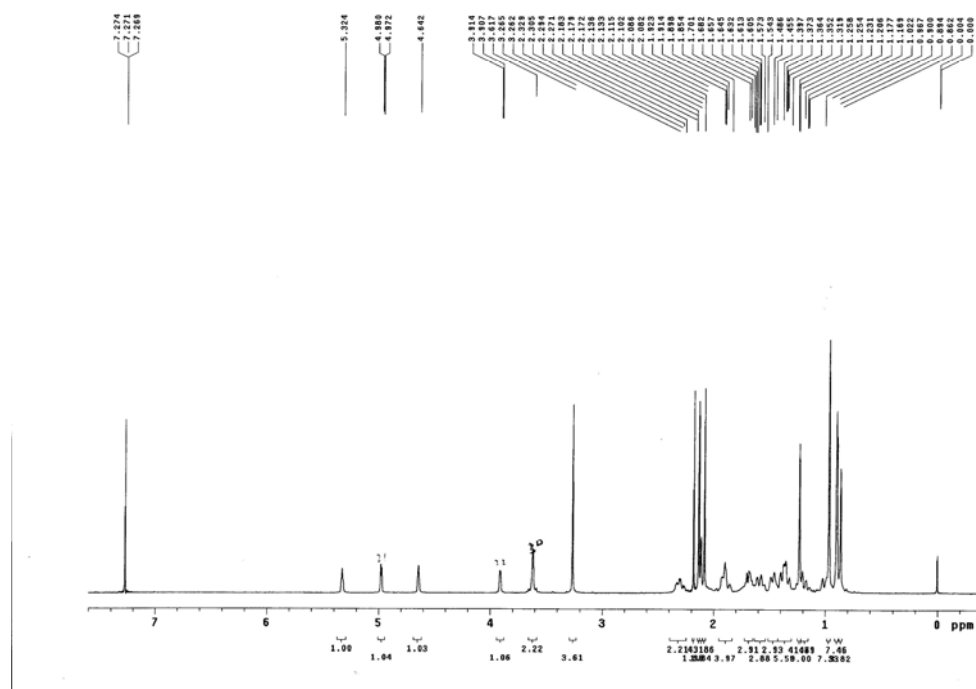

Figure S14. The magnified  $^1\text{H}$  NMR spectrum of **5** in  $\text{CDCl}_3$ .

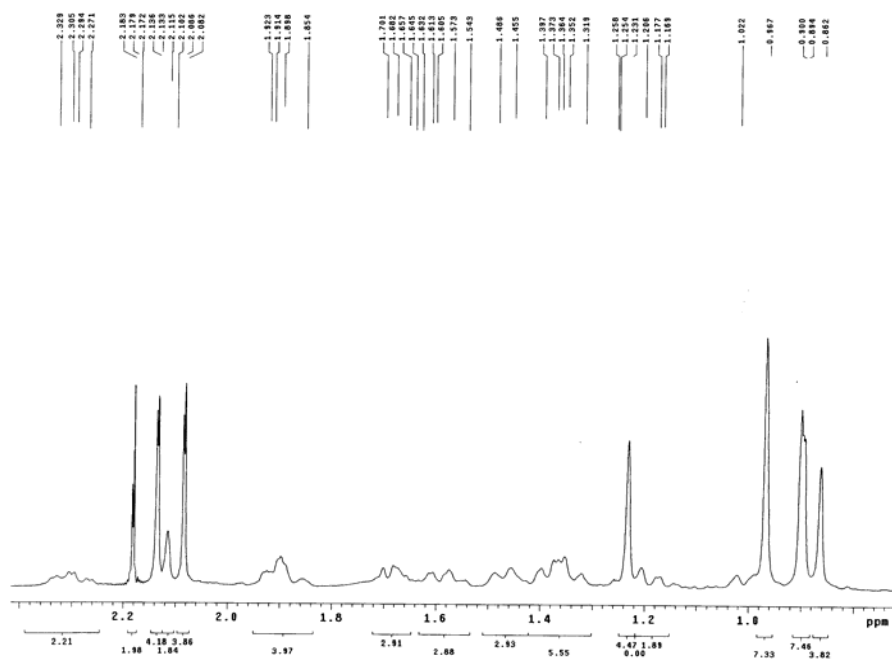



Figure S15. <sup>13</sup>C NMR(DEPT) spectrum of **5** in CDCl<sub>3</sub>.

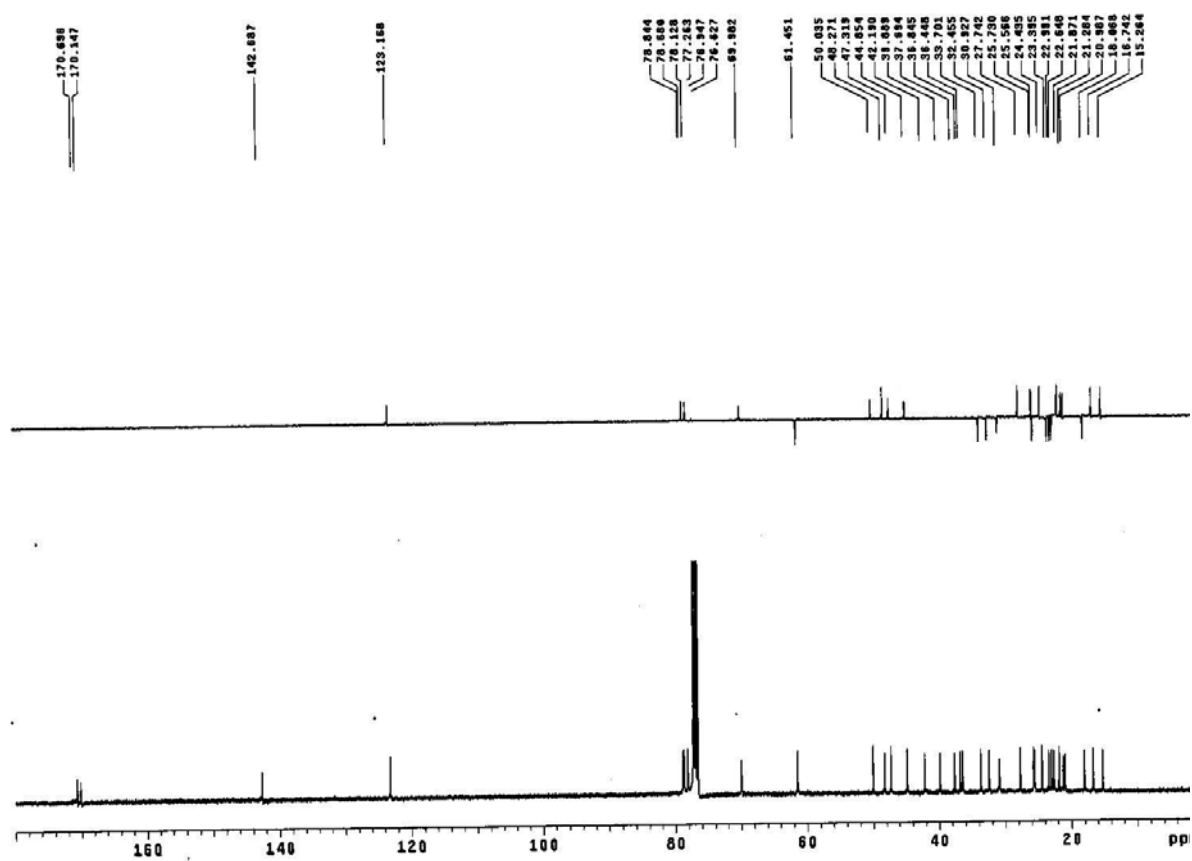

Figure S16. HRESIMS of **5**.

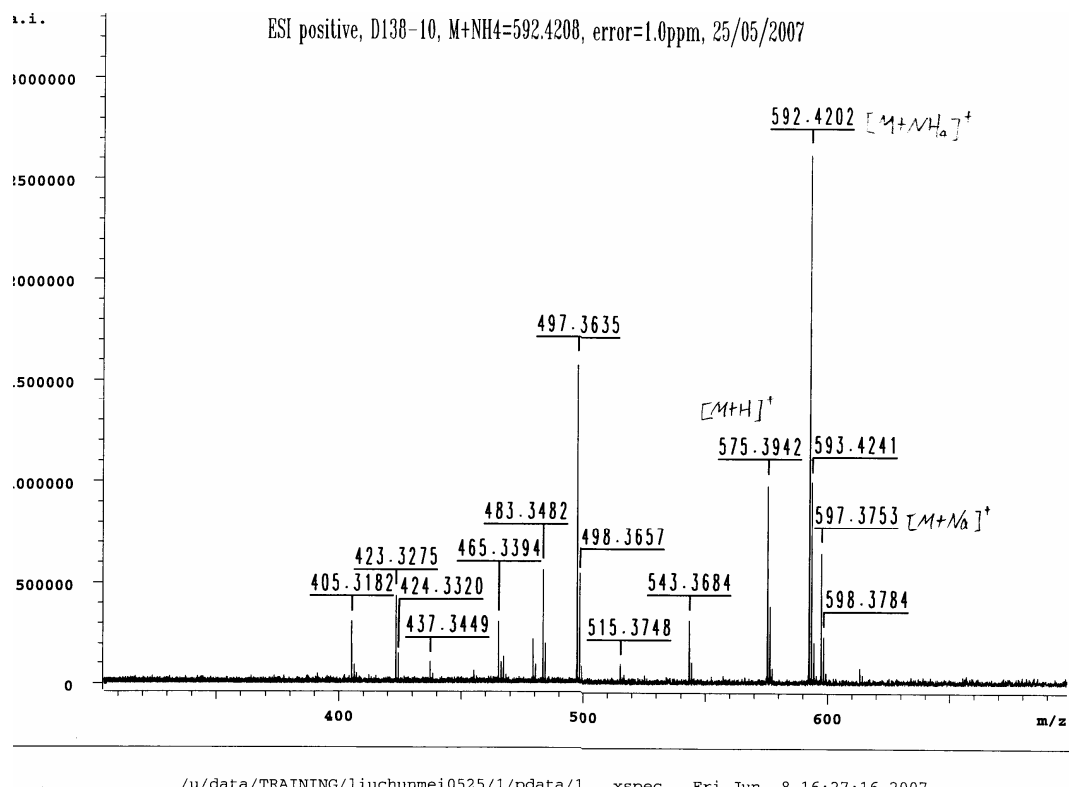

Figure S17.  $^1\text{H}$  NMR spectrum of **6** in  $\text{CDCl}_3$ .

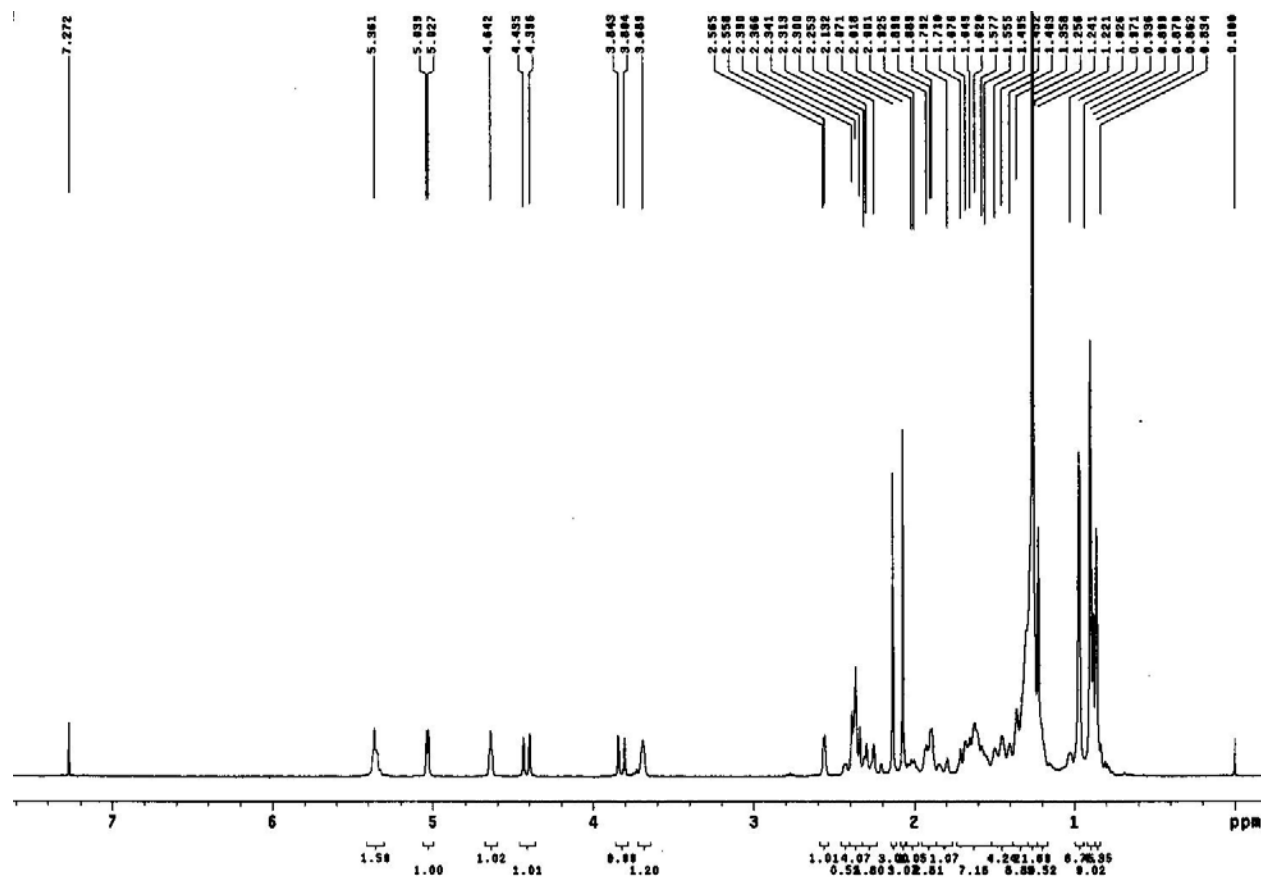

13

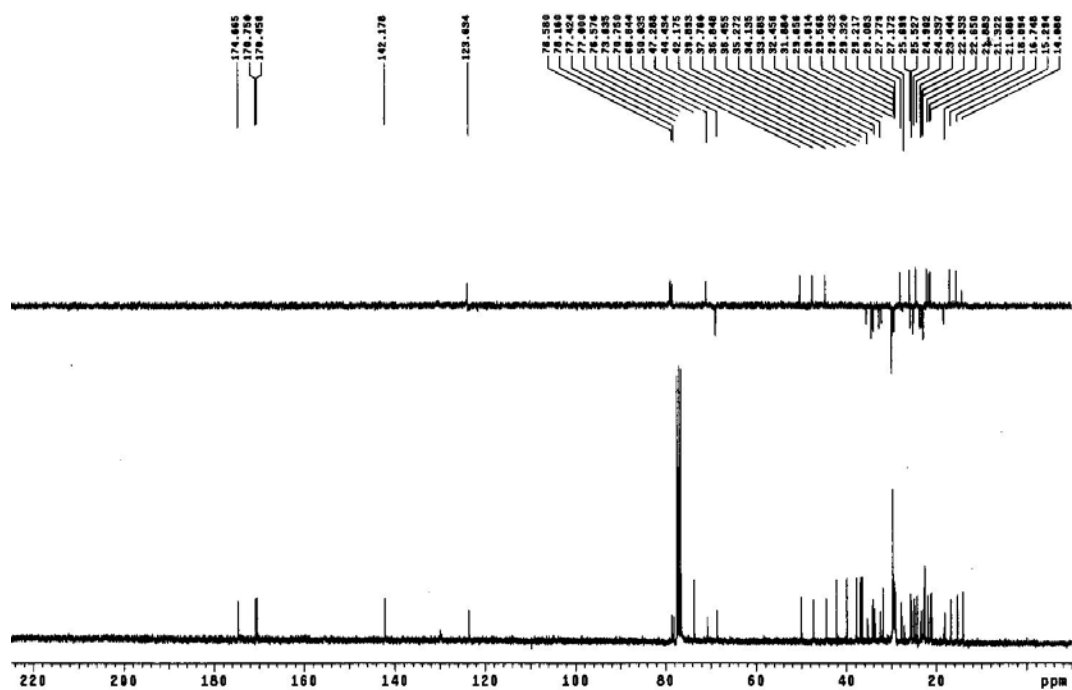

Figure S19. HRESIMS of **6**.

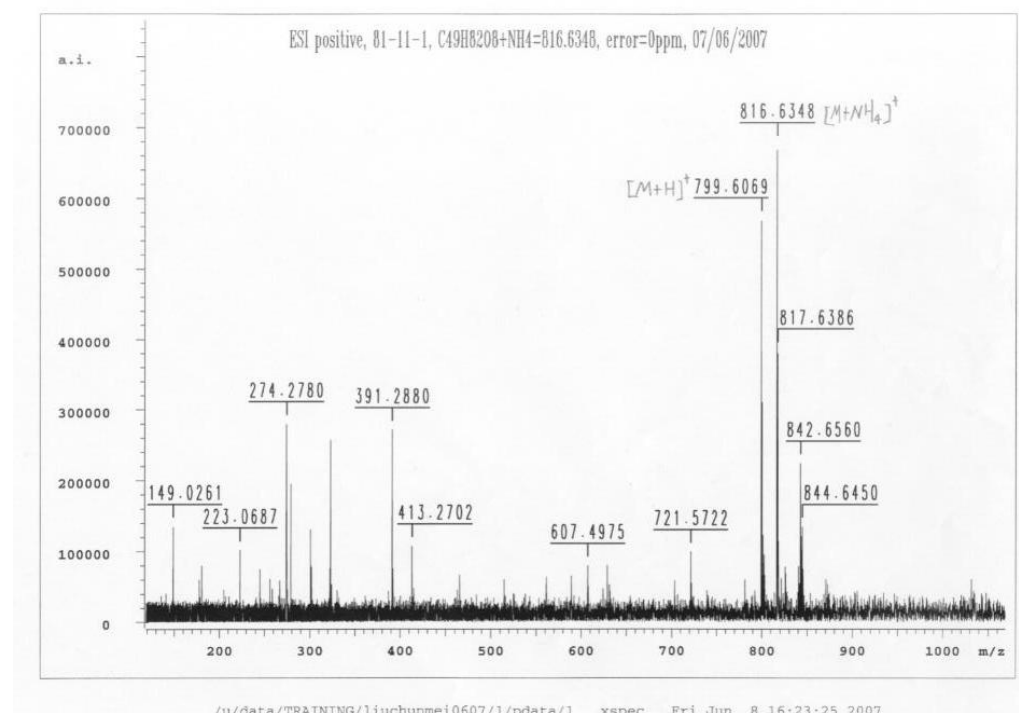

Supplement: Supplementary file 1 [file 4636153]
